# Supplementary material
Source: HighWire-hosted journal article supplement (https://jnm.snmjournals.org/highwire/filestream/118856/field_highwire_adjunct_files/0/267297_Supplemental_Data.pdf)
Supplement: 267297_Supplemental_Data.pdf [file 267297_Supplemental_Data.pdf]

## Supplemental Data

**Supplemental Table 1:** Recommended activity and volume of radiopharmaceuticals per joint

| Joint    | [ <sup>90</sup> Y]Y-citrate (MBq) | [ <sup>186</sup> Re]Re-sulfide (MBq) | Volume (mL) |
|----------|-----------------------------------|--------------------------------------|-------------|
| Knee     | 148-278                           | N/A                                  | 3.0         |
| Hip      | 185                               | 111-185                              | 3.0         |
| Shoulder | 93                                | 74-111                               | 3.0         |
| Elbow    | 93                                | 56-93                                | 1.0-2.0     |
| Wrist    | N/A                               | 37-74                                | 1.0-1.5     |
| Ankle    | 74                                | 74                                   | 1.0-1.5     |

Abbreviations: N/A: not applicable.

**Supplemental Table 2:** Volume of methylprednisolone acetate 40 mg/mL injected per joint during the radiosynoviorthesis

| Joint    | Volume of methylprednisolone acetate (mL) |
|----------|-------------------------------------------|
| Knee     | 0.5-1.0                                   |
| Hip      | 0.5-1.0                                   |
| Shoulder | 0.5-1.0                                   |
| Elbow    | 0.5                                       |
| Wrist    | 0.5                                       |
| Ankle    | 0.5                                       |

**Supplemental Table 3:** Detailed AEs (*n* = 55)

| AE (joint)              | Onset     | Grade    | Related to radiosynoviorthesis | Treatment                                     | Resolution                                         |
|-------------------------|-----------|----------|--------------------------------|-----------------------------------------------|----------------------------------------------------|
| <b>Joint reaction</b>   |           |          |                                |                                               |                                                    |
| Inflamed (knee)         | Immediate | Mild     | Not related                    | N/M                                           | Resolved                                           |
| Pain (knee)             | 4 days    | Moderate | Possibly related               | N/M                                           | Resolved                                           |
| Pain (knee)             | 4 days    | Moderate | Possibly related               | N/M                                           | Resolved                                           |
| Pain (knee)             | 4 days    | Unknown  | Unknown                        | N/M                                           | Unknown                                            |
| Pain (knee)             | 4 days    | Mild     | Not related                    | N/M                                           | Unknown                                            |
| Pain (knee)             | 4 days    | Moderate | Related                        | No treatment                                  | Unknown                                            |
| Pain (knee)             | 4 days    | Mild     | Related                        | Ice                                           | Resolved                                           |
| Pain (knee)             | 4 days    | Mild     | Related                        | No treatment                                  | Resolved                                           |
| Inflamed (knee)         | 4 days    | Mild     | Not related                    | N/M                                           | Unknown                                            |
| Inflamed (knee)         | 4 days    | Severe   | Related                        | N/M                                           | Unknown                                            |
| Inflamed (knee)         | 4 days    | Severe   | Related                        | N/M                                           | Unknown                                            |
| Inflamed (knee)         | 4 days    | Mild     | Related                        | No treatment                                  | Resolved                                           |
| Inflamed (knee)         | 4 days    | Mild     | Related                        | No treatment                                  | Resolved                                           |
| Swelling (knee)         | 4 days    | Moderate | Related                        | No treatment                                  | Resolved                                           |
| Effusion (knee)         | 4 days    | Moderate | Related                        | Aspiration                                    | Unknown                                            |
| Effusion (knee)         | 1 week    | Moderate | Not related                    | N/M                                           | Resolved                                           |
| Swelling (knee)         | 2 weeks   | Moderate | Related                        | Aspiration, intra-articular GC, codeine PRN   | Unknown                                            |
| Pain (knee)             | 2.5 weeks | Moderate | Related                        | Aspiration, intra-articular GC                | Resolved                                           |
| Swelling (knee)         | 2.5 weeks | Moderate | Related                        | Aspiration, intra-articular GC                | Unknown                                            |
| Swelling (elbow)        | 1 month   | Mild     | Not related                    | N/M                                           | Unknown                                            |
| Inflamed (knee)         | 3 months  | Severe   | Possibly related               | Aspiration, prednisone                        | Resolved with sequelae (decreased joint amplitude) |
| Swelling (knee)         | 3 months  | Moderate | Possibly related               | N/M                                           | Unknown                                            |
| Swelling (knee)         | 3 months  | Unknown  | Unknown                        | Intra-articular GC, voltaren and emphagel PRN | Unknown                                            |
| Effusion (knee)         | 3 months  | Unknown  | Unknown                        | Intra-articular GC, prednisone                | Resolved                                           |
| Pain (knee)             | 6 months  | Moderate | Not related                    | N/M                                           | Resolved                                           |
| Effusion (knee)         | 6 months  | Severe   | Not related                    | Aspiration, intra-articular GC                | Unknown                                            |
| Stiffness (ankle)       | 6 months  | Moderate | Not related                    | N/M                                           | Unknown                                            |
| Septic arthritis (knee) | 12 months | Severe   | Not related                    | Irrigation and debridement                    | Resolved                                           |

| followed by antibiotics PO/IV   |           |          |                  |                                                            |          |
|---------------------------------|-----------|----------|------------------|------------------------------------------------------------|----------|
| <b>Skin reaction</b>            |           |          |                  |                                                            |          |
| Skin hematoma (wrist)           | 4 days    | Mild     | Related          | N/M                                                        | Resolved |
| Cutaneous necrosis (wrist)      | 3 months  | Mild     | Possibly related | N/M                                                        | Resolved |
| Cutaneous necrosis (wrist)      | 7 months  | Severe   | Possibly related | Irrigation, debridement, and Limberg skin flap for closure | Resolved |
| Skin hematoma (elbow)           | 12 months | Mild     | Not related      | N/M                                                        | Resolved |
| <b>Systemic reaction</b>        |           |          |                  |                                                            |          |
| Nausea (knee)                   | 1 hour    | Mild     | Possibly related | No treatment                                               | Resolved |
| Flushing (knee)                 | 4 days    | Mild     | Possibly related | N/M                                                        | Resolved |
| Flushing (ankle)                | 4 days    | Mild     | Possibly related | N/M                                                        | Resolved |
| Flushing (knee)                 | 4 days    | Mild     | Possibly related | N/M                                                        | Resolved |
| Flushing (knee)                 | 4 days    | Mild     | Possibly related | No treatment                                               | Resolved |
| Flushing (knee)                 | 4 days    | Mild     | Possibly related | No treatment                                               | Resolved |
| Flushing (knee)                 | 4 days    | Mild     | Possibly related | N/M                                                        | Resolved |
| Flushing (knee)                 | 4 days    | Mild     | Possibly related | N/M                                                        | Resolved |
| Flushing (knee)                 | 4 days    | Mild     | Possibly related | N/M                                                        | Resolved |
| Flushing (knee)                 | 4 days    | Mild     | Possibly related | N/M                                                        | Resolved |
| Flushing (knee)                 | 4 days    | Mild     | Possibly related | N/M                                                        | Resolved |
| Flushing (knee)                 | 4 days    | Mild     | Possibly related | N/M                                                        | Resolved |
| Flushing (knee)                 | 4 days    | Unknown  | Unknown          | N/M                                                        | Unknown  |
| Flushing (shoulder)             | 4 days    | Mild     | Possibly related | N/M                                                        | Resolved |
| Flushing (elbow)                | 4 days    | Mild     | Possibly related | No treatment                                               | Resolved |
| Flushing (elbow)                | 4 days    | Unknown  | Unknown          | Ibuprofen                                                  | Resolved |
| Flushing (elbow)                | 4 days    | Mild     | Possibly related | No treatment                                               | Resolved |
| Fever and chills (knee)         | 4 days    | Mild     | Not related      | N/M                                                        | Resolved |
| Fever and chills (knee)         | 4 days    | Mild     | Not related      | N/M                                                        | Resolved |
| Lymphadenopathy (knee)          | 4 days    | Unknown  | Unknown          | Acetaminophen                                              | Resolved |
| Palpitations (knee)             | 4 days    | Moderate | Not related      | No treatment                                               | Resolved |
| Lymphadenopathy (ankle)         | 12 months | Severe   | Not related      | N/M                                                        | Unknown  |
| <b>Medication errors (knee)</b> | 3 months  | Severe   | Not related      | Dextrose IV                                                | Resolved |

Abbreviations: AE: adverse event, GC: glucocorticoid, IV: intravenous, N/M: non-mentioned, PO: per os, PRN: if necessary.
